# Supplementary material for: Functional and clinical characterization of the alternatively spliced isoform AML1-ETO9a in adult patients with translocation t(8;21)(q22;q22.1) acute myeloid leukemia (AML)
Source: PubMed Central journal article supplement (PMC7214266; doi:10.1038/s41375-019-0551-4), 2019-08-28

# Figure S1

**a**

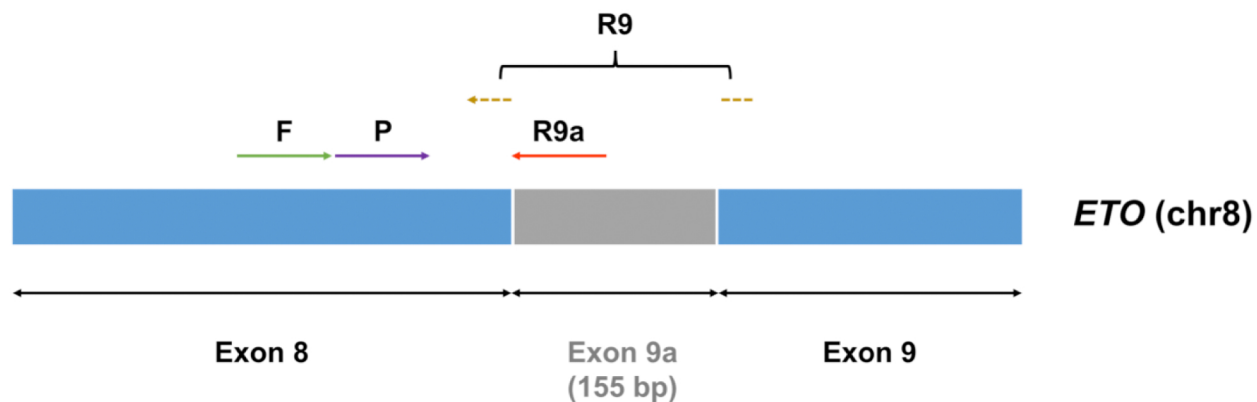

**b**

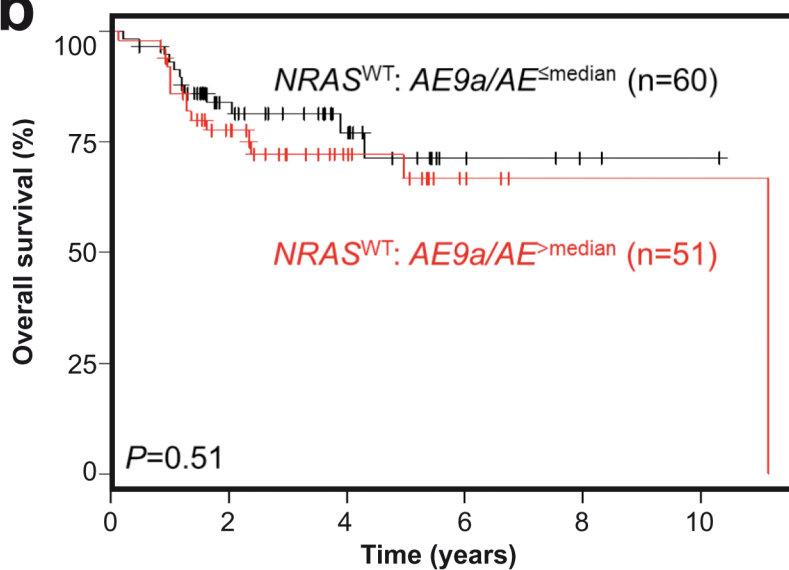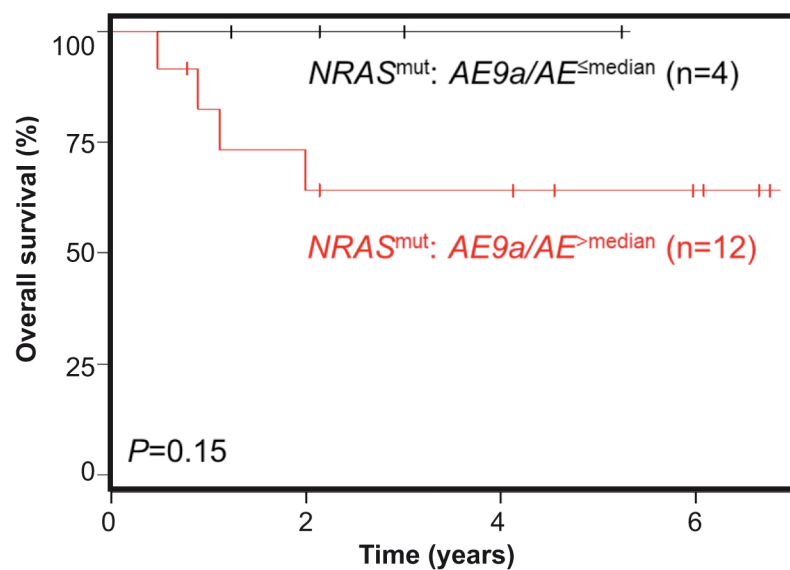

**c**

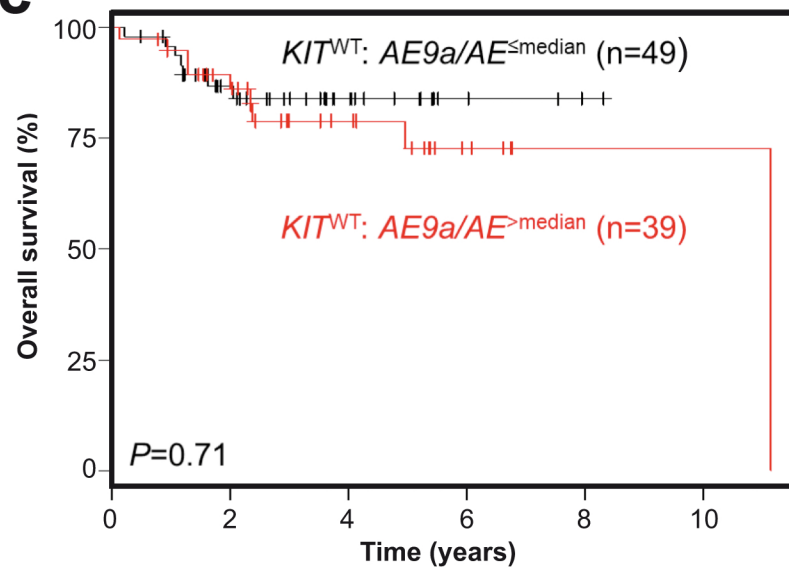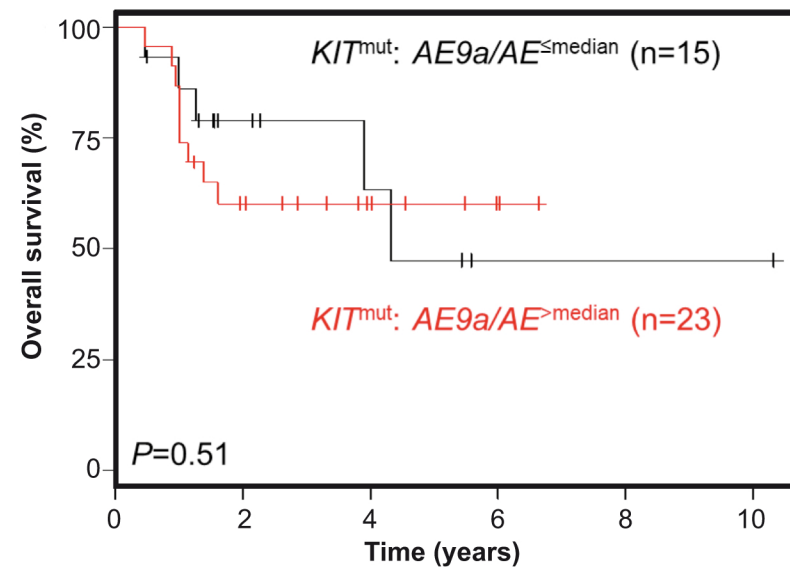

# Figure S2

**a**

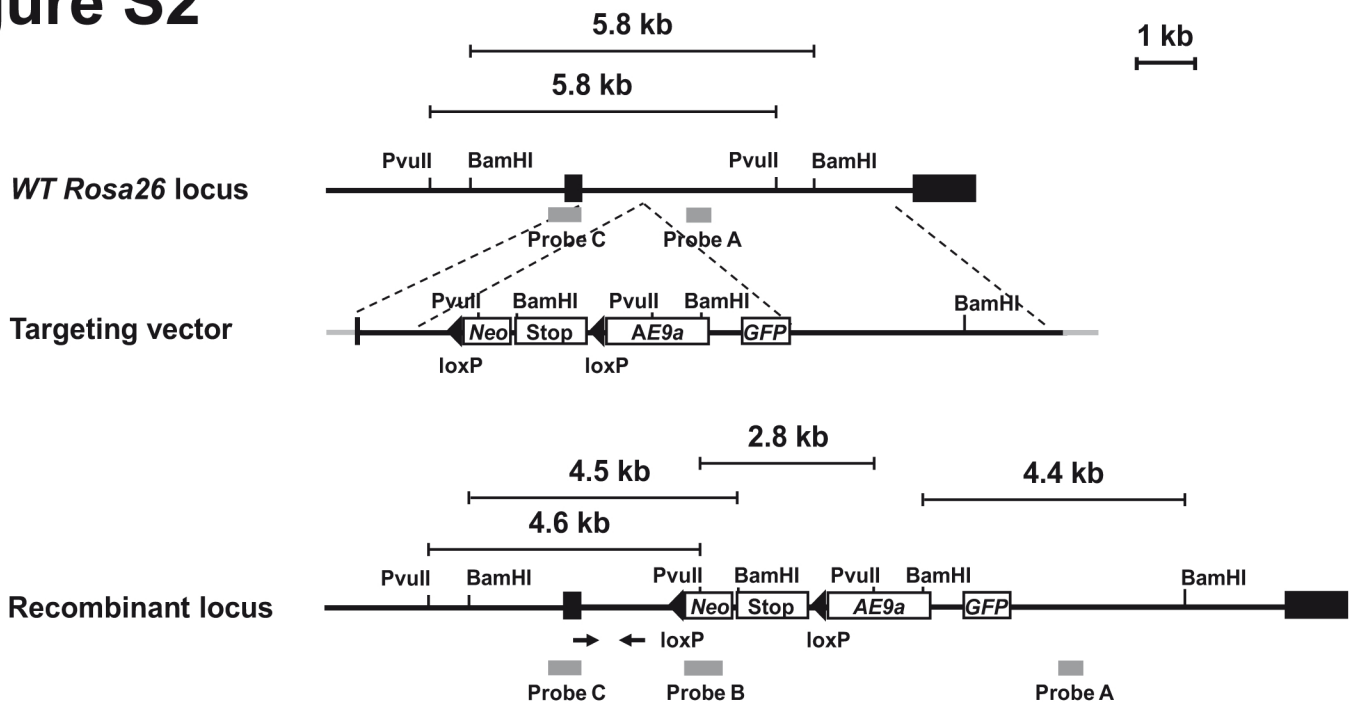

**b**

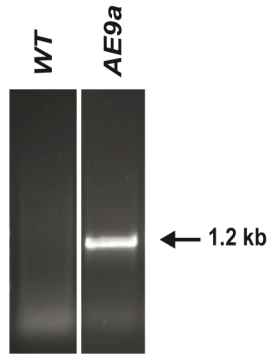

**c**

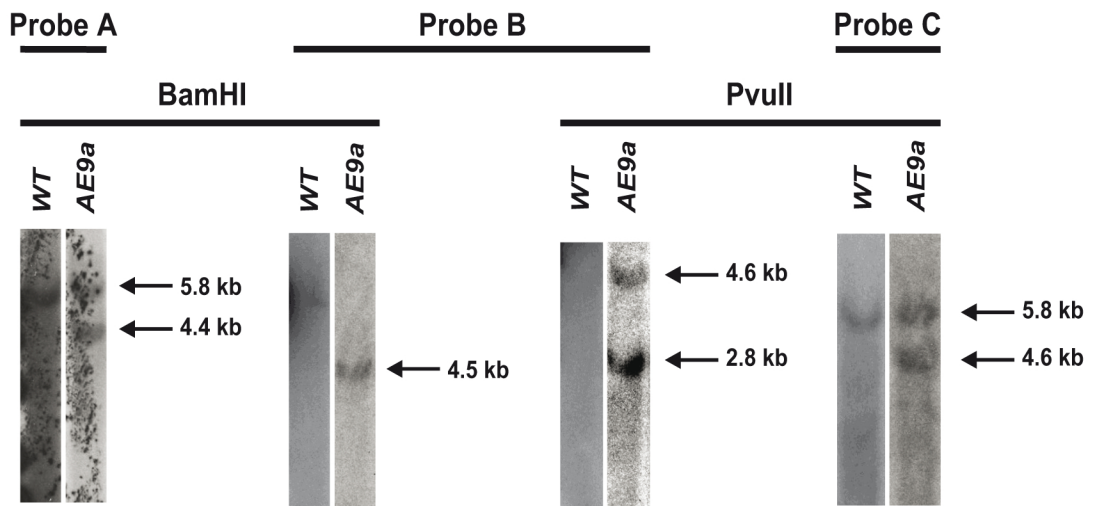

**d**

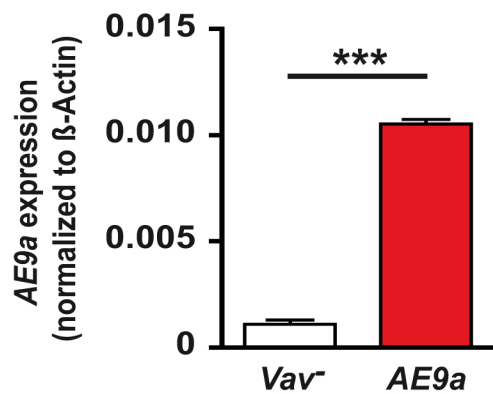

**f**

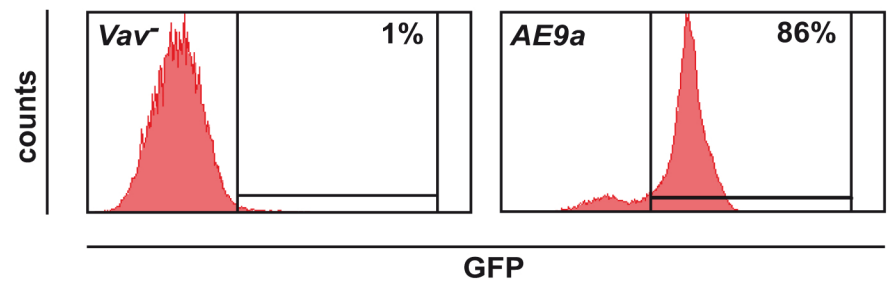

**e**

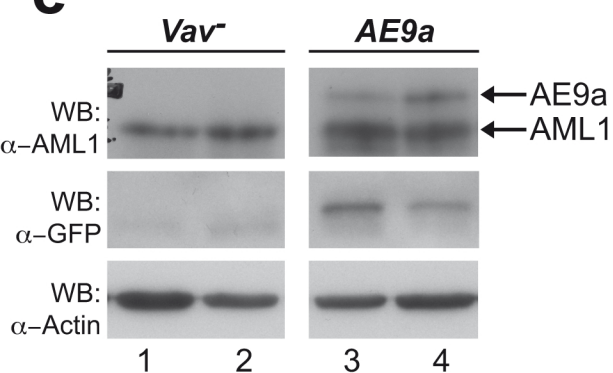

**g**

|                  |                  | PB                 | BM                | SP                 |
|------------------|------------------|--------------------|-------------------|--------------------|
| Vav <sup>-</sup> | mean ( $\pm$ SD) | 1.0 ( $\pm$ 1.0)   | 1.1 ( $\pm$ 0.8)  | 2.1 ( $\pm$ 1.5)   |
|                  | range            | 0.1 - 3.2          | 0.2 - 2.9         | 0.4 - 5.4          |
| AE9a             | mean ( $\pm$ SD) | 69.2 ( $\pm$ 13.2) | 88.7 ( $\pm$ 6.5) | 63.7 ( $\pm$ 13.5) |
|                  | range            | 43.9 - 94.2        | 73.5 - 97.2       | 39.4 - 87.1        |
|                  |                  | p<0.001            | p<0.001           | p<0.001            |

# Figure S3

**a**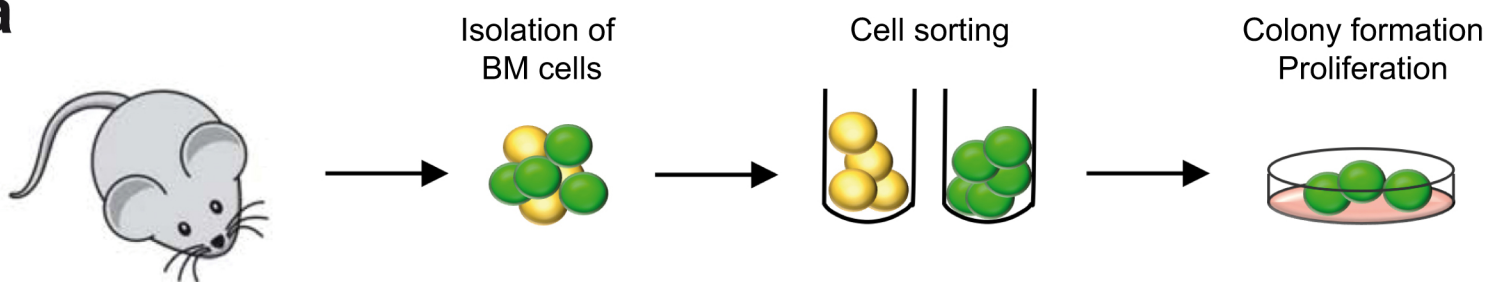**b**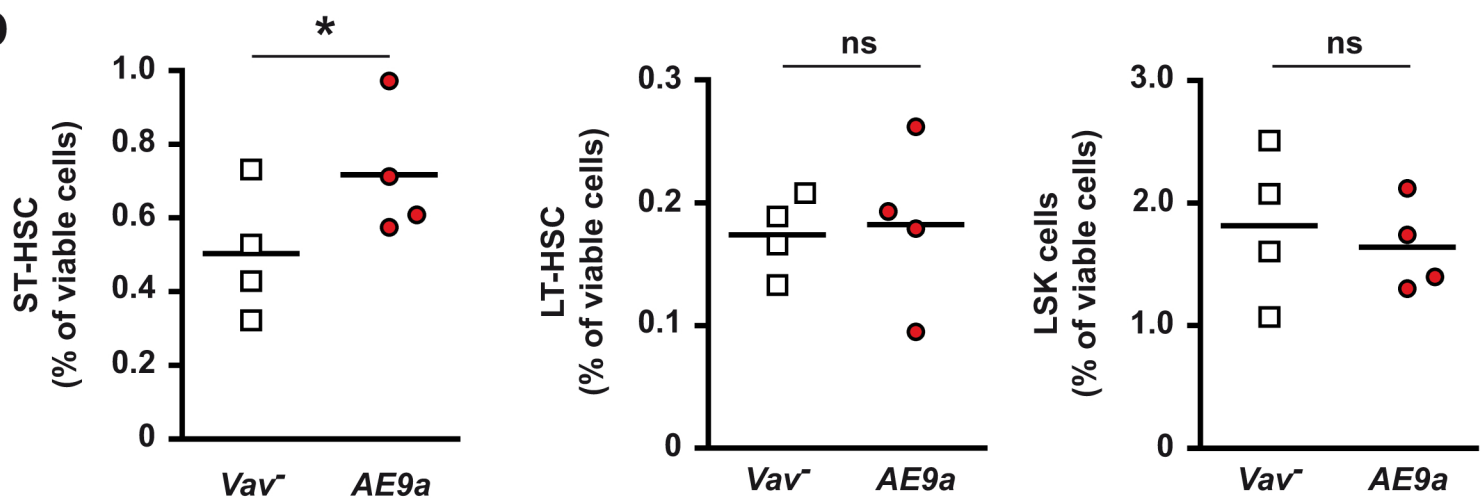**c**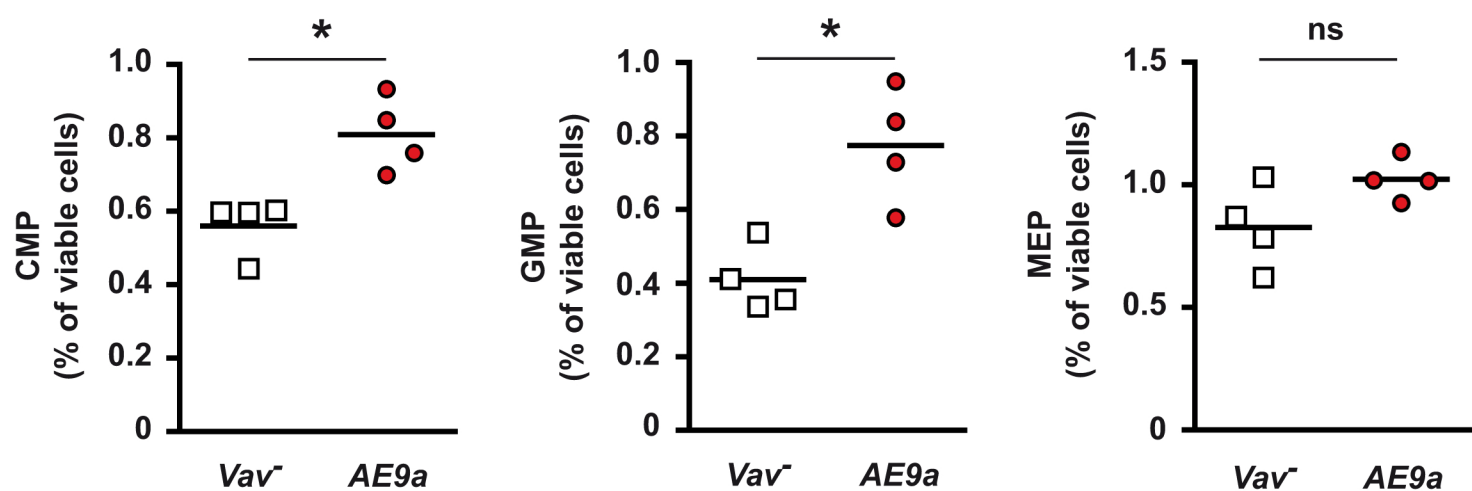**d**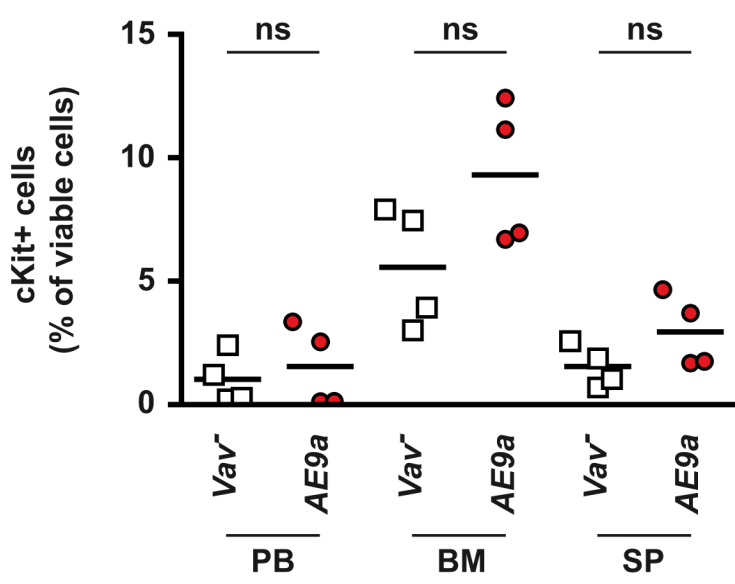

Supplement: 41375_2019_551_MOESM2_ESM.pdf [file 41375_2019_551_MOESM2_ESM.pdf]
