# Supplementary material for: Functional and clinical characterization of the alternatively spliced isoform AML1-ETO9a in adult patients with translocation t(8;21)(q22;q22.1) acute myeloid leukemia (AML)
Source: PubMed Central journal article supplement (PMC7214266; doi:10.1038/s41375-019-0551-4), 2019-08-28
Supplement: 41375_2019_551_MOESM1_ESM.pdf [file 41375_2019_551_MOESM1_ESM.pdf]

1 **Functional and Clinical Characterization of the Alternatively Spliced Isoform *AML1-ETO9a* in**  
2 **Adult Patients with translocation t(8;21)(q22;q22.1) Acute Myeloid Leukemia (AML)**

3 Mridul Agrawal<sup>1#</sup>, Peggy Schwarz<sup>2#</sup>, Benedetto Daniele Giaimo<sup>3</sup>, Ivan Bedzhov<sup>4</sup>, Andrea Corbacioglu<sup>1</sup>, Daniela Weber<sup>1</sup>, Verena I.  
4 Gaidzik<sup>1</sup>, Nikolaus Jahn<sup>1</sup>, Frank G. Rücker<sup>1</sup>, Thomas Schroeder<sup>5</sup>, Thomas Kindler<sup>6</sup>, Mohammed Wattad<sup>7</sup>, Katharina Götze<sup>8</sup>,  
5 Michael Lübbert<sup>9</sup>, Hans Salwender<sup>10</sup>, Mark Ringhoffer<sup>11</sup>, Elisabeth Lange<sup>12</sup>, Elisabeth Koller<sup>13</sup>, Felicitas Thol<sup>14</sup>, Michael Heuser<sup>14</sup>,  
6 Arnold Ganser<sup>14</sup>, Lars Bullinger<sup>15</sup>, Peter Paschka<sup>1</sup>, Hartmut Döhner<sup>1</sup>, Hartmut Geiger<sup>16, 17</sup>, Tilman Borggrefe<sup>3</sup>, Konstanze Döhner<sup>1\*</sup>  
7 and Franz Oswald<sup>2\*</sup>

8  
9 <sup>1</sup>Klinik für Innere Medizin III, Universitätsklinikum Ulm, Ulm, Germany; <sup>2</sup>Klinik für Innere Medizin I, Universitätsklinikum Ulm, Ulm,  
10 Germany; <sup>3</sup>Institute of Biochemistry, University of Giessen, Giessen, Germany; <sup>4</sup>Embryonic Self-Organization research group  
11 Max Planck Institute for Molecular Biomedicine Röntgenstraße 20, 48149 Münster, Germany <sup>5</sup>Klinik für Hämatologie, Onkologie und  
12 Klinische Immunologie, Universitätsklinikum Düsseldorf, Düsseldorf, Germany; <sup>6</sup>III. Medizinische Klinik und Poliklinik,  
13 Universitätsmedizin Mainz, Mainz, Germany; <sup>7</sup>Klinik für Hämatologie, Internistische Onkologie und Stammzelltransplantation,  
14 Evangelisches Krankenhaus Essen-Werden, Essen, Germany; <sup>8</sup>III. Medizinische Klinik, Klinikum rechts der Isar der Technischen  
15 Universität München, München, Germany; <sup>9</sup>Klinik für Innere Medizin I, Universitätsklinikum Freiburg, Freiburg, Germany <sup>10</sup>II.  
16 Medizinische Abteilung, Asklepios Klinik Altona, Hamburg, Germany; <sup>11</sup>Medizinische Klinik III, Städtisches Klinikum Karlsruhe, Karlsruhe,  
17 Germany; <sup>12</sup>Klinik für Hämatologie, Onkologie und Palliativmedizin, Evangelisches Krankenhaus Hamm, Hamm, Germany; <sup>13</sup>Medizinische  
18 Abteilung, Hanusch-Krankenhaus der WGKK, Wien, Austria; <sup>14</sup>Klinik für Hämatologie, Hämostaseologie, Onkologie und  
19 Stammzelltransplantation, Medizinische Hochschule Hannover, Hannover, Germany; <sup>15</sup>Medizinische Klinik m. S. Hämatologie, Onkologie  
20 und Tumorimmunologie, Campus Virchow-Klinikum, Charité Universitätsmedizin Berlin, Berlin, Germany, <sup>16</sup>Institut für Molekulare  
21 Medizin, Universität Ulm, Ulm, Germany; <sup>17</sup>Division of Experimental Hematology and Cancer Biology, CCHMC, Cincinnati, USA.

22  
23 **Running title:** *AML1-ETO9a* in t(8;21)-AML.

24 **Correspondence:** Konstanze Döhner, MD, Department of Internal Medicine III, University  
25 Hospital of Ulm, Albert-Einstein-Allee 23, D-89081 Ulm, Germany. Phone: (+49) 731-500 45501,  
26 Fax: (+49) 731-500 45505, E-mail: [konstanze.doehner@uniklinik-ulm.de](mailto:konstanze.doehner@uniklinik-ulm.de)

27 <sup>#</sup> MA and PS contributed equally to this study

28 <sup>\*</sup> KD and FO share senior authorship

29

30

31 **SUPPLEMENTAL APPENDIX**

32

33 **METHODS**

34

35 **Quantification of *AML1-ETO9a***

36 qRT-PCR reactions were carried out using the MicroAmp<sup>TM</sup> Fast Optical 96-Well Reaction Plate  
37 (Applied Biosystems, Foster City, CA). The total volume was 25  $\mu$ l based on the following  
38 protocol: 2.5  $\mu$ l cDNA, 12.5  $\mu$ l TaqMan<sup>®</sup> Universal PCR Master Mix (2 x), 3 pmol/ $\mu$ l of forward  
39 and reverse primers, as well as 3 pmol/ $\mu$ l of a FAM/BHQ2 labeled probe, respectively. In the  
40 case of *AE*, 1 pmol/ $\mu$ l of a FAM/TAMRA labeled probe was used. PCR conditions were: 50°C for 2  
41 minutes and 95°C for 10 minutes, followed by 50 cycles at 95°C for 15 seconds and 60°C for 60  
42 seconds. Primer, probe and qRT-PCR design of *AE9a* are provided in Table S5 and Figure S1.  
43 Primer and probes for the detection of *AE* were chosen based on the "A Europe Against Cancer  
44 Program" (EAC) protocol (1).

45 qRT-PCR analyses for *AE9a* and *AE* were performed in triplicate and included patient samples,  
46 negative template controls (NTC) and serial plasmid dilutions ( $10^2$ - $10^6$ ) for the respective genes.  
47 *ABL1* was quantified in duplicate, serial plasmid dilutions ranged from  $10^2$  to  $10^4$ . QuantStudio  
48 12K Flex Software (Applied Biosystems, Foster City, CA) was used for visualization of the  
49 amplification curves and  $C_t$  value calculation. The threshold for  $C_t$  values was set to 0.1 and  
50 baseline intervals were 3 to 15. The mean slope was -3.52 and the mean Y-intercept was 45.7  $C_t$ .  
51 Negativity in all NTC and a correlation coefficient of the standard curve  $\geq 0.99$  was mandatory for  
52 further evaluation. qRT-PCR negativity was defined as  $C_t > Y$ -intercept.

53

54 **Patients**

55 93 of the 129 patients with t(8;21)-AML were enrolled on one of five clinical trial protocols of  
56 the German-Austrian AML Study Group (AMLSG): AML HD98A (NCT00146120; n=10), AMLSG  
57 06-04 (NCT00151255; n=4), AMLSG 07-04 (NCT00151242; n=37), AMLSG 11-08 (NCT00850382;  
58 n=27) and AMLSG 21-13 (NCT02013648; n=15); 36 patients were treated outside clinical studies.

59

60 **Statistical Analyses**

61 The following statistical approaches were used for clinical outcome analyses: cumulative  
62 incidence of relapse (CIR) was calculated according to Kalbfleisch and Prentice, differences  
63 between two groups were analyzed using Gray's test (2) and the median follow-up for survival  
64 was determined according to the method of Korn (3). The definition of CR, event-free survival  
65 (EFS), relapse-free survival (RFS), and overall survival (OS) were based on consensus  
66 recommendations of the European LeukemiaNet (4). Correlations between continuous variables  
67 were calculated using the Spearman rank test. Kaplan-Meier analysis was applied for survival  
68 estimation, differences between two groups were reported using the two-sided log-rank test.  
69 An effect was considered significant in case the *P*-value was below 5%. All statistical analyses  
70 were performed with the statistical software environment R version 3.2.1, using the R packages  
71 Hmisc version 3.13-0, survival version 2.37-7 and cmprsk version 2.2-6.

72

73 **Cell culture**

74 Feeder cells and Embryonic Stem Cells (ESCs) were grown at 37°C with 5% CO<sub>2</sub> in DMEM  
75 (Biochrom, FG0435) supplemented with 15% FCS, 1% Pen/Strep (Gibco, 15070-63), 1 mM Na-  
76 Pyruvate (Gibco, 11360.039), 2 mM L-Glutamin (Gibco, 25030-024), 1x MEM-NEAA (Gibco,  
77 1140-035) and β-mercaptoethanol (Sigma-Aldrich, M7522-100ML). Only in the case of the ESCs,  
78 the medium was supplemented with 500 U/ml LIF (ESGRO, ESG1107). To prevent the  
79 differentiation of the ESCs, MAPK inhibitor PD98059 and GSK3β inhibitor SB216763 were added  
80 to 50 μM and 5 μM, respectively (2i medium). Feeder cells were inactivated with 20 μg/ml of  
81 mitomycin C (Sigma-Aldrich MO503). ESCs were electroporated with the plasmid DNA of choice  
82 and seeded on inactive feeder cells at different dilutions. After 24 h incubation at 37°C,  
83 positively electroporated cells were selected with 500 μg/ml G418 (Sigma-Aldrich A1720-56).  
84 Single positive colonies were transferred to 96 wells plates in which inactive feeder cells were  
85 previously seeded. After replica of the 96 wells plates, one plate for each line was frozen at -  
86 80°C after adding DMSO and the other plates were expanded to purify the genomic DNA (gDNA)  
87 and perform screening via PCR and Southern Blotting.

88

#### 89 **Genomic DNA (gDNA) extraction, PCR and Southern Blotting**

90 ESCs were washed with PBS and lysed in gDNA extraction buffer (10 mM Tris-HCl pH 7.5, 10 mM  
91 EDTA, 10 mM NaCl, 0.5% NLauroylsarcosine sodium salt, 1 mg/ml Proteinase K) overnight at  
92 37°C. The gDNA was precipitated by adding NaCl/EtOH and washed with 70% EtOH. The pellet  
93 was finally resuspended in TE pH 8.0 and analyzed by PCR and Southern Blotting.

94 The gDNA was digested overnight using 50 U of the desired restriction enzyme (NEB)  
95 accordingly to manufacturer's instructions and the digestion was subsequently extended for 6

96 more hours with 50 more U of the respective enzyme. The gDNA was resolved on a 0.6%  
97 agarose gel and subsequently incubated in Denaturation Buffer (1.5 M NaCl, 0.5 M NaOH) for 40  
98 min at room temperature. After washing twice in Neutralization Buffer (1.5 M NaCl, 0.5 M Tris-  
99 HCl pH 7.0) for 20 min each at room temperature, the gDNA was transferred overnight to a  
100 Hybond-N membrane (Amersham, RPN203N) and cross-linked. To prepare the probes, 15 µg of  
101 the plasmids of choice were digested overnight with 20 U of the restriction enzyme (NEB) of  
102 choice (see Table S6) and purified from a 2% agarose gel with the Genelute gel extraction kit  
103 (Sigma-Aldrich) accordingly to manufacturer's instructions. Probes were labeled with  
104 radioactive  $\gamma$ -<sup>32</sup>P dCTP (Hartman Analytic GmbH, SRP-205) using the Megaprime DNA labelling  
105 System (Amersham, RPN1606) accordingly to manufacturer's instructions and purified with  
106 Quick Spin Columns (Roche, Cat. No.11273965001) following manufacturer's instructions.  
107 For the hybridization of the membranes, the 5x MP-Mix [5% SDS (w/v), 5% milk (w/v)] was pre-  
108 heated at 56°C and the Pre-hybridization-Mix [4x SSC (20x stock solution, 3 M NaCl, 0.3 M  
109 trisodium citrate dihydrate pH 7.0), 1x MP-Mix, 300 µg/ml Salmon Sperm DNA (Sigma-Aldrich  
110 D1626)] was pre-heated at 100°C for 10 min. The membrane was blocked 4 hours at 65°C in Pre-  
111 hybridization-Mix. Labelled probes were added to the Hybridization-Mix [3.6x SSC, 0.9x MP-Mix,  
112 450 µg/ml Salmon Sperm DNA, 18% Dextran sulfate (w/v)] and denatured at 100°C for 10  
113 minutes. The membrane was hybridized over night at 65°C and washed at 50°C in Washing  
114 Buffer [0.1x SSC, 0.05% SDS (w/v)]. Signals were detected with a light sensitive film.  
115 For mouse genotyping purposes, ear patches or tail sections were digested overnight in 200 µl  
116 of Proteinase K solution (10 mM Tris-HCl pH 8.0, 5 mM EDTA, 1% SDS, 300 mM sodium acetate,

117 200 µg/ml Proteinase K). The day after, the gDNA was precipitated by adding 2-propanol and  
118 washed with 70% EtOH. Finally, the gDNA was resuspended in TE buffer and analyzed by PCR.  
119 In the case of the screening of the ESCs, the Taq polymerase (Genaxxon, M3043-0.250) was  
120 used with primers "Rosa26 AE 9a fw" and "Rosa26 AE 9a rev" For mouse genotyping purposes  
121 the DreamTaq (Fermentas, EP0701) was used together with primers "oIMR8545" and  
122 "oIMR8546" to discriminate between homo- and heterozygotes or with primers "EGFP dir" and  
123 "TV rosa up" to discriminate between targeted and wild-type alleles. Primers are listed in Table  
124 S5.

125

## 126 **Plasmids**

127 The following plasmids were kindly provided by Drs. Hassan Jumaa and Martina Bach: pCR21-  
128 TOPO-EP-5', TV-Rosa26-Fc(g)RI, TV-Rosa26-LMP1. Details on the targeting vector TV-Rosa26-Fc-  
129 AE9a-IRES-GFP are available on request. Briefly, an AE9a-IRES-GFP cassette was constructed as  
130 *AscI/AscI* fragment by PCR aided cloning. This AE9a-IRES-GFP fragment was then inserted into  
131 the TV-Rosa26-Fc(g)RI vector after *AscI* digestion. All Plasmids are listed in Table S6.

132 30 µg of each targeting plasmid were digested for at least 16 h with 50 U of *AgeI* (NEB) at 37°C  
133 and the digestion was subsequently extended for 2 more hours at 37°C with 10 more U of *AgeI*.  
134 The digestion was monitored on a 0.8% agarose gel and the linearized plasmids purified by  
135 phenol/chloroform extraction followed by precipitation with sodium acetate/EtOH. The  
136 linearized DNA was washed in 70% EtOH, air-dried, resuspended in PBS and used for  
137 electroporation of ESCs.

138

139 **Mice**

140 The successfully targeted ESCs were injected into C57BL/6 blastocysts by the Transgenic Mouse  
141 Unit of the Max Planck Institute of Immunobiology and Epigenetics in Freiburg im Breisgau  
142 (Germany). The injected blastocysts were transferred into recipient foster mothers and the  
143 agouti-colored chimera mice were mated to C57BL/6 mice to test the germ line transmission of  
144 the targeted locus (Table S7). To specifically express AE9a in the hematopoietic compartment,  
145 mice were crossed with *Vav1*-Cre mice (5). Mice were bred and housed in specific pathogen free  
146 conditions in accordance with institutional, state and federal guidelines on animal welfare. All  
147 animal experiments were carried out in cooperation with the animal facility at the University of  
148 Ulm in accordance with the Tierschutzgesetz §8, Abs. 1 und 3.

149

150 **Isolation of bone marrow cells and splenocytes**

151 Bone marrow cells were isolated from femora, tibiae and hips of the mice by grinding the bones  
152 with mortar and pestle in PBS (Life Technologies, 14190-094) containing 10% FCS (Sigma Aldrich,  
153 F2442,) and 1% Penicillin/Streptomycin (Pen/Strep, Gibco, 15140-122). Cells were subsequently  
154 washed with PBS containing 10% FCS and 1% Pen/Strep and filtered through a 40 µm cell  
155 strainer (Corning, 352340,) to remove remaining bone fragments.

156 Spleen was grinded through a 40 µm cell strainer into PBS containing 10% FCS and 1% Pen/Strep  
157 to obtain splenocytes that were subsequently washed and once more filtered through a 40 µm  
158 cell strainer.

159

160 **Proliferation assay and colony formation assay**

161 Mononuclear bone marrow cells were enriched by density gradient centrifugation (Histopaque,  
162 Sigma-Aldrich, 1083) and stained for cKit (anti-c-Kit-AlexaFluor700, clone ACK2, eBioscience)  
163 before fluorescence-activated cell scanner sorted on a FACS Aria™ III (BD Biosciences,  
164 Heidelberg, Germany; Lineage<sup>-</sup>, cKit<sup>+</sup> for *Vav*<sup>-</sup> mice or Lineage<sup>-</sup>, cKit<sup>+</sup>, GFP<sup>+</sup> for *AE9a* mice).  
165 For the proliferation assay, each 30000 sorted cells/mouse were seeded in 6-well dishes and  
166 cultured in 5 ml DMEM medium supplemented with 15% FCS (Sigma Aldrich, F2442), 1 %  
167 Pen/Strep and recombinant mouse IL-3, IL-6 and SCF (final concentration 0.1 ng/ml,  
168 respectively, all ImmunoTools, Germany). After 7 days, cells were counted and 10% of them  
169 were re-seeded for additional 7days. This procedure was repeated twice. For the colony  
170 formation assay, triplicates of each 100 cells/mouse were seeded on methylcellulose-based  
171 semi-solid media (R&D Systems USA, HSC008) in 6-well dishes. Colony-forming progenitors were  
172 scored every 7 days and replated in new methylcellulose medium at a concentration of  $1 \times 10^4$   
173 cells/well for a total of 5 weeks.

174

#### 175 **Flow cytometry**

176 For the analyses of stem and progenitor cells, mononuclear bone marrow cells were isolated  
177 from femora, tibiae and hips of the mice after density gradient centrifugation (Histopaque,  
178 Sigma-Aldrich, 1083). After blocking with purified CD16/CD32 antibody (BioLegend, 101302),  
179 cells were incubated with a cocktail of biotinylated antibodies (Biotin anti-mouse Lineage Panel,  
180 133307) directed against specific surface molecules to exclude Lin<sup>+</sup> cells: anti-CD11b (clone  
181 M1/70), anti-B220 (clone RA3-6B2), anti-CD3 (clone 145-2C11) anti-Gr-1 (clone RB6-8C5), anti-  
182 Ter119 and Streptavidin-Brilliant Violet605 as secondary antibody (405229, all from BioLegend).



183 Subsequently, cells were incubated with anti-Sca-1-PE-Cy7 (clone D7, eBioscience), anti-c-Kit-  
184 AlexaFluor700 (clone ACK2, eBioscience), anti-CD127/IL7R $\alpha$ -APC-eFluor780 (clone A7R34,  
185 eBioscience), anti CD16/CD32-eFluor450 (Fc $\gamma$ R, clone 93, eBioscience), anti-Flt3-PE (clone  
186 A2F10, eBioscience), anti-CD34-eFluor660 (clone RAM34, eBioscience) as well as Streptavidin-  
187 Brilliant Violet605 (BioLegend) for 20 min on ice. Cells were washed with PBS to remove  
188 unbound antibodies and resuspended in propidium iodide solution (0.1  $\mu$ l/ml in PBS, Sigma,  
189 P4864) to exclude dead cells in the subsequent analyses on a LSRFortessa™ II (BD Biosciences,  
190 Heidelberg, Germany). The following marker combinations were used to discriminate between  
191 HSC and progenitor cells: LT-HSC: Lin $^{-}$ , Sca-1 $^{+}$ , c-Kit $^{+}$ , Flt3 $^{-}$ , CD34 $^{-}$ ; ST-HSC: Lin $^{-}$ , Sca-1 $^{+}$ , c-Kit $^{+}$ , Flt3 $^{-}$ ,  
192 CD34 $^{+}$ ; CMPs: Lin $^{-}$ , Sca-1 $^{-}$ , c-Kit $^{+}$ , Fc $\gamma$ R $^{low}$ , CD34 $^{+}$ ; GMPs: Lin $^{-}$ , Sca-1 $^{-}$ , c-Kit $^{+}$ , Fc $\gamma$ R $^{+}$ , CD34 $^{+}$ ; MEPs:  
193 Lin $^{-}$ , Sca-1 $^{-}$ , c-Kit $^{+}$ , Fc $\gamma$ R $^{-}$ , CD34 $^{-}$ . To assess the cKit $^{+}$  cell population in peripheral blood, bone  
194 marrow and spleen, cells were processed as stated above, blocked and incubated with anti-c-  
195 Kit-AlexaFluor700 (clone ACK2, eBioscience) for 20 min on ice prior to washing and  
196 resuspending in propidium iodide solution. Subsequently, cells were analyzed on a  
197 LSRFortessa™ II (BD Biosciences, Heidelberg, Germany).

198

### 199 **Survival of Mice**

200 The Kaplan–Meier survival curve and statistical analyses were performed using GraphPad  
201 Prism4 software (GraphPad Software, San Diego, CA, USA).

202

### 203 **Western Blotting**

204 For the generation of whole cell protein extracts from bone marrow, cells were pelleted and  
205 lysed in Laemmli buffer (0.35 M Tris HCl pH6.8, 10.28% SDS, 36% glycerine, 5%  $\beta$ -  
206 Mercaptoethanol, 0.012% bromphenol blue) for 30 min on ice before remaining cell fragments  
207 were separated by centrifugation. After separation on 10 % SDS-polyacrylamide gels, the  
208 proteins were electrophoretically transferred to PVDF membranes (Millipore) for 1 h at 250 mA  
209 using a Tris-glycine buffer system. Membranes were blocked with 3% milk powder in PBS-T  
210 (0.1% Tween-20 in PBS) and incubated with the selected antibodies ( $\alpha$ -AML1: Cell Signaling,  
211 4334;  $\alpha$ -GFP: Roche Diagnostics GmbH, 11814460001;  $\alpha$ - $\beta$ -Aktin:, Sigma Aldrich, A1978)  
212 accordingly to manufacturer's instructions.

213

#### 214 **Hemavet**

215 White Blood cell counts (WBC) was taken from peripheral blood as well as bone marrow and  
216 splenic cell suspensions on a HEMAVET 950FS (Drew Scientific Inc, USA).

217

#### 218 **Quantitative RT-PCR of murine cells**

219 Isolation of total cell RNA from mouse splenocytes was performed with the RNeasy Mini Kit  
220 (QIAGEN, Germany). Briefly, the splenic tissue was mechanically disrupted (Ultra-Thurrax, Janke  
221 & Kunkel, IKA Labortechnik, Germany) in RLT buffer (provided in the kit) and lysates were  
222 immediately transferred to QIAshredder columns to remove cellular debris. Subsequently, the  
223 RNA was isolated following the kit's instructions. For every probe, 1 $\mu$ g of RNA was transcribed  
224 to cDNA with the SuperScript<sup>TM</sup> II Reverse Transcriptase Kit (Thermo Fisher Scientific Germany,  
225 18064014) according to the manufacturer's protocol using random hexamer primers (Thermo

226 Fisher Scientific, 48190011). Specific mRNA expression levels of *AE9 $\alpha$*  (primer sequence is given  
227 in Table S5) and the housekeeping gene  $\beta$ -Actin (QuantiTect Primer Assay QIAGEN,  
228 QT01136772,) were analyzed on a 7500 Fast Real-Time PCR System (Applied Biosystems,  
229 Germany) with the RT2 SYBR<sup>®</sup> Green qPCR Mastermix (QIAGEN, 330529) and calculated with  
230 the 7500 Fast System SDS Software (Applied Biosystems).

231

232

## 233 SUPPLEMENTAL TABLES

234 **Table S1.** Patient characteristics.

|                                                     | Patients with <i>RUNX1-RUNX1</i> -positive AML (n=129) |
|-----------------------------------------------------|--------------------------------------------------------|
| Median age, years (range)                           | 49 (18 – 75)                                           |
| Male sex, n (%)                                     | 67 (52)                                                |
| AML history, n (%)                                  |                                                        |
| <i>De novo</i>                                      | 114 (90)                                               |
| Secondary                                           | 2 (2)                                                  |
| Therapy-related                                     | 11 (9)                                                 |
| Missing data, n                                     | 2                                                      |
| Median WBC, x 10 <sup>9</sup> /l (range)            | 9.2 (1.2 – 117.5)                                      |
| Missing data, n                                     | 4                                                      |
| Median platelet count, x 10 <sup>9</sup> /l (range) | 28 (3 - 303)                                           |
| Missing data, n                                     | 4                                                      |
| Median hemoglobin, g/dl (range)                     | 8.7 (3.8 – 15.1)                                       |
| Missing data, n                                     | 4                                                      |
| Median peripheral blood blasts, % (range)           | 41 (0 - 99)                                            |
| Missing data, n                                     | 10                                                     |
| Median bone marrow blasts, % (range)                | 60 (6 - 100)                                           |
| Missing data, n                                     | 7                                                      |
| Median LDH, U/l (range)                             | 466 (5 - 10823)                                        |
| Missing data, n                                     | 2                                                      |
| <i>KIT</i> mutation, n (%)                          | 38 (30)                                                |
| Missing data, n                                     | 3                                                      |
| <i>FLT3</i> -ITD/TKD mutation, n (%)                | 12 (9)                                                 |
| Missing data, n                                     | 0                                                      |
| <i>NRAS</i> mutation, n (%)                         | 16 (13)                                                |
| Missing data, n                                     | 2                                                      |
| <i>ASXL2</i> mutation, n (%)                        | 20 (19)                                                |
| Missing data, n                                     | 26                                                     |
| Double induction treatment, n (%)                   | 82 (64)                                                |
| Single induction treatment, n (%)                   | 45 (35)                                                |
| Non-intensive induction treatment, n (%)            | 2 (2)                                                  |

|                                       |          |
|---------------------------------------|----------|
| <b>Consolidation treatment, n (%)</b> | 124 (96) |
| <b>autoHSCT</b>                       | 2 (2)    |
| <b>alloHSCT*</b>                      | 7 (5)    |
| <b>HiDAC</b>                          | 115 (89) |

235

236

237 **Table S2.** Correlation of median *AE9a/AE* ratio with clinical features.

|                  | <b>Rho (Spearman)</b> | <b>P</b> |
|------------------|-----------------------|----------|
| <b>Age</b>       | 0.04                  | 0.68     |
| <b>WBC</b>       | 0.07                  | 0.44     |
| <b>Platelets</b> | 0.02                  | 0.79     |
| <b>LDH</b>       | -0.18                 | 0.045    |
| <b>BM blasts</b> | -0.06                 | 0.52     |

238 Abbreviations: WBC, white blood cell count; LDH, lactate dehydrogenase; BM, bone marrow; *P*, p-value.

239

240

241 **Table S3.** Impact of *AE9a/AE* ratios on survival endpoints (Cox regression analysis).

|                              | <b>OS</b> |          | <b>EFS</b> |          | <b>CIR</b> |          |
|------------------------------|-----------|----------|------------|----------|------------|----------|
|                              | HR        | <i>P</i> | HR         | <i>P</i> | HR         | <i>P</i> |
| <b><i>AE9a/AE</i> ratios</b> | 0.99      | 0.99     | 1.21       | 0.82     | 0.92       | 0.93     |

242 Abbreviations: OS, overall survival; EFS, event-free survival; CIR, cumulative incidence of relapse; *P*, p-value. NOTE:

243 Analyses stratified by study

244

245

246

247 **Table S4.** Prognostic impact of *AE9a/AE* ratios dichotomized at the median on clinical outcome.

|                                            | <b>OS (%)</b> |          | <b>EFS (%)</b> |          | <b>CIR (%)</b> |          |
|--------------------------------------------|---------------|----------|----------------|----------|----------------|----------|
|                                            |               | <i>P</i> |                | <i>P</i> |                | <i>P</i> |
| <b><i>AE9a/AE</i><sup>&gt;median</sup></b> | 71            | 0.37     | 67             | 0.83     | 32             | 0.35     |
| <b><i>AE9a/AE</i><sup>≤median</sup></b>    | 79            |          | 59             |          | 33             |          |

248 Abbreviations: OS, overall survival; EFS, event-free survival; CIR, cumulative incidence of relapse; *P*, p-value.

249

250 **Table S5.** PCR primers and probes used in this study.

| Oligonucleotide                            | Sequence                                               | 251 |
|--------------------------------------------|--------------------------------------------------------|-----|
| <b>AE9a mRNA quantification (patients)</b> |                                                        |     |
| AML-ETO-CFP                                | 5'-TCC GGC GGT ACA GTG A-3'                            |     |
| AML-ETO-89R                                | 5'-CCG ATG CGC GTC TAG T-3'                            |     |
| AML-ETO-9AR                                | 5'-AAG CTG GGC AGC ACC TA-3'                           |     |
| AML-ETO-CP                                 | 5'-AGG CAG CAG AGT CCC GTC AAC CC-3'<br>5'FAM, 3'-BHQ2 |     |
| <b>ESCs screening</b>                      |                                                        |     |
| Rosa26 AE 9a fw                            | 5'-CCT CAG AGA GCC TCG GCT A-3'                        |     |
| Rosa26 AE 9a rev                           | 5'-GGA CAG GAT AAG TAT GAC ATC A-3'                    |     |
| <b>Mouse genotyping</b>                    |                                                        |     |
| oIMR8545                                   | 5'-AAA GTC GCT CTG AGT TGT TAT-3'                      |     |
| oIMR8546                                   | 5'-GGA GCG GGA GAA ATG GAT ATG-3'                      |     |
| EGFP dir                                   | 5'-GGT GGT GCC CAT CCT GGT CG-3'                       |     |
| TV rosa up                                 | 5'-CCA GAT GAC TAC CTA TCC TCC-3'                      |     |
| <b>AE9a mRNA quantification (mice)</b>     |                                                        |     |
| RT_AE9a_up                                 | 5'-AGT CGC CAC CTA CCA CAG AG-3'                       |     |
| RT_AE9a_do                                 | 5'-CTT CAC ATC CAC AGG TGA GTC TG-3'                   |     |

252 Abbreviations: AML-ETO-CFP, common forward primer; AML-ETO-89R, reverse primer spanning fragments of *ETO*  
 253 exon 8 and 9; AML-ETO-9AR, reverse primer containing fragments of *ETO* exon 9a; AML-ETO-CP, common probe.  
 254

255

256 **Table S6.** Plasmids used for targeting and to generate the probes for Southern blotting. The  
 257 location of the probes on the targeted *ROSA26* locus and the restriction enzymes used to  
 258 generate the probes are also indicated.

| <b>Probe plasmids</b>     |                           |                |
|---------------------------|---------------------------|----------------|
| <b>Plasmid</b>            | <b>Probe</b>              | <b>Enzymes</b> |
| pCR21-TOPO-EP-5'          | short arm probe (Probe C) | XhoI/SacI      |
| TV-Rosa26-Fc(g)RI         | internal probe (Probe B)  | NcoI/MluI      |
| TV-Rosa26-LMP1            | long arm (Probe A)        | HindIII        |
| <b>Targeting plasmids</b> |                           |                |
| <b>Plasmid</b>            |                           |                |
| TV-Rosa-Fc IRES GFP       |                           |                |
| TV-Rosa-Fc AE9a IRES GFP  | see text                  | AscI/AscI      |

259

260

261 **Table S7.** Results of the injections of ESCs targeted with AE9a and grown in 2I medium.

|                | <b>No. transferred embryos</b> | <b>No. pups born (% of embryos)</b> | <b>% of chimerism</b>                                     | <b>No. germ line transmission</b> |
|----------------|--------------------------------|-------------------------------------|-----------------------------------------------------------|-----------------------------------|
| <b>AE9a 1D</b> | 120                            | 7 (5.8%)                            | 0, 0, 85, 95, 100, 100, 100                               | 1                                 |
| <b>AE9a 6B</b> | 106                            | 14 (13.2%)                          | 100, 95, 75, 85, 100, 100, 95, 95, 75, 85, 85, 85, 85, 95 | 0                                 |
| <b>AE9a 6D</b> | 63                             | 9 (14.3%)                           | 100, 90, 100, 85, 95, 100, 100, 100, 100                  | 5                                 |
| <b>AE9a 7C</b> | 60                             | 10 (16.7%)                          | 95, 90, 100, 85, 100, 100, 75, 70, 85                     | 3                                 |

262 No., numbers

263

264 **SUPPLEMENTAL FIGURE LEGENDS**

265 **Figure S1.** (a) Schematic overview of *AE9a* and PCR design. Abbreviations: F, forward primer; P,  
266 PCR probe; R9a, reverse primer containing exon 9a fragments; R9, reverse primer containing  
267 exon 8 and 9 fragments; bp, base pairs. (b and c) Prognostic impact of AE9a/AE ratio on clinical  
268 outcome according to signaling gene mutation status. (b) OS in patients with *NRAS* wild-type  
269 (*NRAS*<sup>WT</sup>, left), and *NRAS* mutated (*NRAS*<sup>mut</sup>, right). (c) OS in patients with *KIT* wild-type (*KIT*<sup>WT</sup>,  
270 left) and *KIT* mutated (*KIT*<sup>mut</sup>, right). OS is shown according to dichotomization of AE9a/AE<sup>>median</sup>  
271 (red) and AE9a/AE<sup>≤median</sup> (black).

272

273 **Figure S2.** Generation and characterization of an inducible *AE9a* expressing mouse model. (a)  
274 Strategy used to target the *ROSA26* locus in ESCs. The wild-type (WT) locus is shown (upper  
275 panel) together with the targeting vector (middle panel) and the recombinant locus (lower  
276 panel). The restriction sites (*PvuII* and *BamHI*) used for the screen are shown together with the  
277 probes used for the Southern blotting screen and the primers (grey bars) used for the PCR  
278 screen. (b) PCR screen of the ESCs electroporated with an empty vector or with a vector  
279 expressing *AE9a*. Positive targeting is indicated by a product of approximately 1.2 kb (primers  
280 are shown as arrows in a, lower panel). (c) Southern blotting of the ESCs electroporated with an  
281 empty vector or with a vector expressing *AE9a*. The gDNA was digested with the indicated  
282 restriction enzymes and analyzed with the probes indicated in the figure and depicted in panel a  
283 (lower panel). (d-g) *AE9a* and *GFP* are exclusively expressed in *AE9a* mice. (d) Total RNA of  
284 splenocytes isolated from 10 weeks old *AE9a* mice (red bar) and *Vav*<sup>-</sup> control mice (white bar)  
285 was reverse transcribed into cDNA and analyzed via qPCR utilizing a primer pair bridging the



286 fusion point of *AE9a*. Data obtained were normalized to the house keeping gene  $\beta$ -Actin and are  
287 shown as mean and standard deviation of duplicate experiments. \*\*\*  $p < 0.001$ . (e) Western  
288 Blotting of bone marrow cells from 10 weeks old *AE9a* mice and *Vav*<sup>-</sup> control mice utilizing  
289 antibodies against AML1 (upper panel), GFP (middle panel) and  $\beta$ -Actin (lower panel) specifically  
290 detected AE9a (upper arrow) as well as GFP in *AE9a* mice but not in *Vav*<sup>-</sup> control mice. (f and g)  
291 Flow cytometric analyses of the GFP expression as a surrogate for the AE9a expression.  
292 Exemplary histograms of bone marrow cells from 10 weeks old mice shown in (f) illustrate that  
293 GFP expression specifically distinguishes *AE9a* mice (right panel, 86% of viable cells are GFP<sup>+</sup>)  
294 from *Vav*<sup>-</sup> littermate controls (left panel, 1% of viable cells are GFP<sup>+</sup>). The table in (g)  
295 summarizes the means ( $\pm$  SD) and the ranges of the GFP<sup>+</sup> population (expressed as % of viable  
296 cells) in peripheral blood (PB), bone marrow (BM) and spleen (SP) in *Vav*<sup>-</sup> control mice and *AE9a*  
297 mice).  $n > 15$  mice/group/tissue.

298  
299 **Figure S3.** Characterization of the leukemogenic potential of the *AE9a* expression mouse model.

300 (a) Schematic overview of the experimental setup for the proliferation assay and the colony  
301 formation assay shown in Figure 2. Low density bone marrow cells were isolated from 12 weeks  
302 old *AE9a* mice and *Vav*<sup>-</sup> littermate controls, FACS sorted for Lineage<sup>-</sup>, cKit<sup>+</sup> cells (*Vav*<sup>-</sup> controls) or  
303 Lineage<sup>-</sup>, cKit<sup>+</sup>, GFP<sup>+</sup> cells (*AE9a* mice) and subsequently subjected to the above mentioned  
304 assays. (b) Flow cytometric measurement of the hematopoietic stem cell pools in 16 weeks old  
305 *AE9a* mice and *Vav*<sup>-</sup> controls. While LSK (Lineage<sup>-</sup>, Sca-1<sup>+</sup>, cKit<sup>+</sup>, right panel) and long-term  
306 hematopoietic stem cell (LT-HSC; LSK, CD34<sup>-</sup>, Flt3<sup>-</sup>, middle panel) pools show no differences  
307 between the analyzed groups, the short-term hematopoietic stem cell (ST-HSC; LSK, CD34<sup>+</sup>, Flt3<sup>-</sup>,

308 left panel) pool is increased in *AE9a* mice (red dots) compared to *Vav*<sup>-</sup> littermate controls (white  
309 squares). Individual and mean values (expressed as '% of viable cells', respectively) from n=4  
310 mice/group are shown. (c) Increased progenitor cell pools in *AE9a* mice. Flow cytometric  
311 analysis of the hematopoietic progenitor cell pools in the bone marrow of 16 weeks old *AE9a*  
312 mice (red dots) and *Vav*<sup>-</sup> littermate controls (white squares) revealed increased common  
313 myeloid progenitors (CMP; Lineage<sup>-</sup>, Sca1<sup>-</sup>, cKit<sup>+</sup> [LS-K], CD34<sup>+</sup>, FcG<sup>med</sup>, left panel) and  
314 granulocyte/macrophage progenitors (GMP; LS-K, CD34<sup>+</sup>, FcG<sup>+</sup>, middle panel) but not  
315 megakaryocyte-erythrocyte progenitors (MEP; LS-K, CD34<sup>+</sup>, FcG<sup>-</sup>, right panel) cell pools in *AE9a*  
316 mice. Individual and mean values (expressed as '% of viable cells', respectively) from n=4  
317 mice/group are shown. (d) The cKit<sup>+</sup> populations are not increased upon *AE9a* expression. Flow  
318 cytometric measurement of the cKit<sup>+</sup> population in peripheral blood (PB), bone marrow (BM)  
319 and spleen (SP) are not altered in 16 weeks old *AE9a* mice (red dots) compared to *Vav*<sup>-</sup>  
320 littermate controls (white squares). Individual and mean values (expressed as '% of viable cells'  
321 from n=4 mice/group) are shown. ns, not significant; \* p<0.05.

322

323 **SUPPLEMENTAL REFERENCES**

324  
325 1. Gabert J, Beillard E, van der Velden VH, Bi W, Grimwade D, Pallisgaard N, et al. Standardization and quality  
326 control studies of 'real-time' quantitative reverse transcriptase polymerase chain reaction of fusion gene  
327 transcripts for residual disease detection in leukemia - a Europe Against Cancer program. *Leukemia* 2003;  
328 **17**: 2318-57.

329 2. Gray R. A class of *K*-sample tests for comparing the cumulative incidence of a competing risk. *Ann Stat*  
330 1988; **16**: 1141-54.

331 3. Korn EL. Censoring distributions as a measure of follow-up in survival analysis. *Stat Med* 1986; **5**: 255-60.

332 4. Döhner H, Estey EH, Amadori S, Appelbaum FT, Büchner T, Burnett AK, et al. Diagnosis and management of  
333 acute myeloid leukemia in adults: recommendations from an international expert panel, on behalf of the  
334 European LeukemiaNet. *Blood* 2010; **115**: 453-74.

335 5. Croker BA, Metcalf D, Robb L, Wei W, Mifsud S, DiRago L et al. SOCS3 is a critical physiological negative  
336 regulator of G-CSF signaling and emergency granulopoiesis. *Immunity* 2004; **20**:153-165.
